# Supplementary material for: WO2 nanoparticles with oxygen vacancies: a high-efficiency electrocatalyst for the conversion of nitrite to ammonia
Source: Royal Society of Chemistry journal article supplement (doi:10.1039/d2ta07523g), 2022-01-01
Supplement: d2ta07523g1.pdf [file d2ta07523g1.pdf]

## Electronic Supplementary Information

### Experimental section

**Materials:** Sodium fluoride (NaF), acetone (C<sub>3</sub>H<sub>6</sub>O), anhydrous ethanol (C<sub>2</sub>H<sub>6</sub>O), ammonium chloride (NH<sub>4</sub>Cl), sodium hydroxide (NaOH), salicylic acid (C<sub>7</sub>H<sub>6</sub>O<sub>3</sub>), sodium citrate dihydrate (C<sub>6</sub>H<sub>5</sub>Na<sub>3</sub>O<sub>7</sub>•2H<sub>2</sub>O), p-dimethylaminobenzaldehyde (C<sub>9</sub>H<sub>11</sub>NO), and sodium nitroferricyanide dihydrate (C<sub>5</sub>FeN<sub>6</sub>Na<sub>2</sub>O•2H<sub>2</sub>O) were purchased from Chengdu Kelong Ltd. High Purity Tungsten Sheet (W) was purchased from Runde Metal Materials Co., Ltd.

**Preparation of WO<sub>2</sub>/W:** The polished W sheet was ultrasonically cleaned with acetone, ethanol, and deionized water for 10 min and dried in air. Then the W sheet was placed in an anodized electrolyte consisting of 0.5% NaF and 1 mol/L H<sub>2</sub>SO<sub>4</sub> with the W sheet as the positive electrode and Pt plates as the negative electrode. The experiment was conducted for 60 minutes at a constant voltage of 40 V. The obtained WO<sub>3</sub> precursor was washed with ethanol and deionized water and dried and then sintered at 750 °C for 3 h in an argon–hydrogen atmosphere. Finally, WO<sub>2</sub> Nanoparticles on the W sheet can be obtained after cooling to room temperature.

**Characterizations:** The crystal structure of the prepared material was determined using an X-ray diffractometer with Cu K $\alpha$  radiation (DX-2700B). microstructural observations were performed on a field–emission scanning electron microscopy (FEI Insect F50) and an atomic resolution scanning transmission electron microscopy (FEI Talos F200S Super). XPS measurements were carried out with Thermo Fischer ESCALAB Xi<sup>+</sup>. The absorbance data were measured via an Ultraviolet-visible (UV–Vis) spectrophotometer (Shimazu UV–2600). EPR spectrum was recorded on a Brüker EMX spectrometer at room temperature.

**Electrochemical measurements:** All electrochemical measurements were carried out in an H-shaped electrochemical cell separated by Nafion 117 membrane using CHI 760E electrochemical workstation (Chenhua, Shanghai). The area of the working electrode immersed in the electrolyte is 0.25 cm<sup>2</sup>. LSV was performed in Ar-saturated 0.1 M NaOH with 0.1 M NaNO<sub>2</sub> at a scan rate of 5 mV s<sup>-1</sup>. All potentials reported in this work were converted to a reversible hydrogen electrode (RHE) scale, and current densities were normalized to the geometric surface area. All experiments were carried out at room temperature (25 °C).

**Determination of NH<sub>3</sub>:** The NH<sub>3</sub> concentration in the electrolyte was determined (the obtained electrolyte was diluted 50 times) by the indophenol blue method. Specifically, 2 mL of electrolyte collected after electrolysis was mixed with 2 mL of coloring solution (1 M NaOH containing 5% salicylic acid and 5% sodium citrate), and 1 mL of oxidizing solution (0.05 M NaClO). Then 0.2 mL oxidation solution (0.05 M NaClO) mL catalyst solution (1 wt% C<sub>5</sub>FeN<sub>6</sub>Na<sub>2</sub>O 2H<sub>2</sub>O) was dropped into the collected solution. After standing in the dark for 2 h, the concentration of NH<sub>3</sub> was determined by UV-Vis at a specific wavelength of 655 nm. The concentration-absorbance curve was calibrated using the standard NH<sub>4</sub>Cl solution with known concentrations of 0.0, 0.25, 0.5, 1.0, 2.0, and 5.0 µg mL<sup>-1</sup> in 0.1 M NaOH. The fitting curve ( $y = 0.43893x + 0.02172$ ,  $R^2 = 0.9999$ ) shows good linear relation of absorbance value with NH<sub>3</sub> concentration.

**Determination of NH<sub>3</sub> yield and FE:**

The NH<sub>3</sub> FE is estimated from the charge consumed for NO<sub>2</sub><sup>-</sup> reduction and the total charge passed through the electrode:

$$FE = 6 \times F \times V \times [\text{NH}_3] / (Q \times 17) \times 100\%$$

The yield rate of  $\text{NH}_3$  (aq) is calculated:

$$\text{NH}_3 \text{ yield} = V \times [\text{NH}_3] / (A \times t \times 17)$$

Where  $[\text{NH}_3]$  is the concentration of  $\text{NH}_3$  (aq),  $F$  is the Faradaic constant (96485 C mol<sup>-1</sup>),  $V$  is the volume of electrolyte in the anode compartment (45 mL),  $Q$  is the total charge passing the electrode,  $t$  is the electrolysis time, and  $A$  is the geometric surface area.

**DFT calculation details:** First-principles calculations with spin-polarized were performed based on density functional theory (DFT) implemented in the VASP package.<sup>1</sup> The projector augmented wave (PAW) method and generalized gradient approximation (GGA) of Perdew–Burke–Ernzerhof (PBE) was utilized to describe the interaction and electron exchange–correlation, respectively.<sup>2,3</sup>  $\text{WO}_2$  slab structure was modeled, and the vacuum region’s thickness is  $>15 \text{ \AA}$  to avoid spurious interaction. The cutoff energy was set to 450 eV. The Brillouin zone was sampled by  $4 \times 5 \times 1$  special  $k$ -points using the Monkhorst Pack scheme for structural configuration optimizations.<sup>4</sup> The force convergence thresholds are 0.02 eV/ $\text{\AA}$  and the total energy is less than  $1\text{E}-5$  eV, respectively. The theoretical calculation results were processed and analyzed by VASPKIT software.<sup>5</sup>

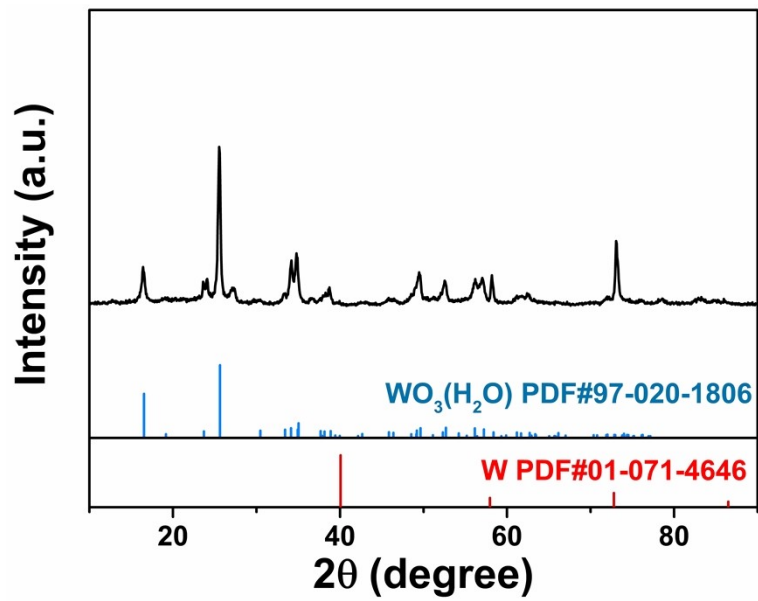

Fig. S1. XRD pattern of the anodized W plate.

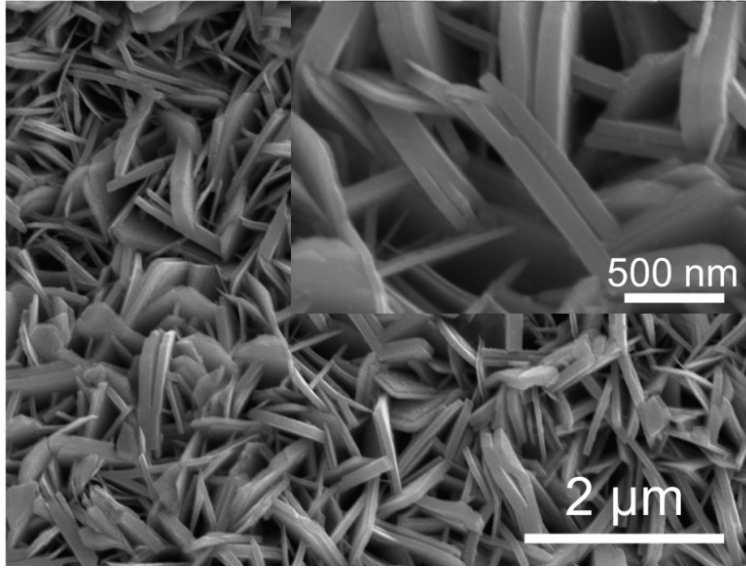

**Fig. S2.** SEM images of the anodized W plate.

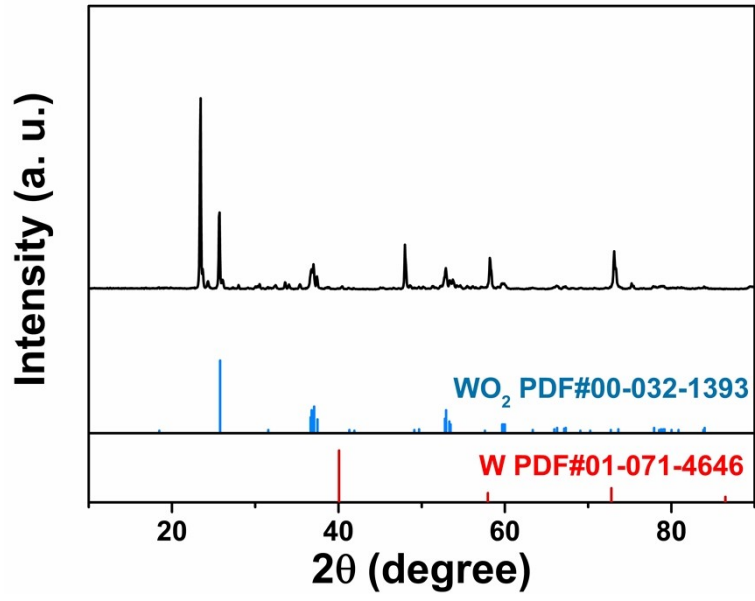

Fig. S3. XRD pattern of WO<sub>2</sub>/W annealed at 700 °C.

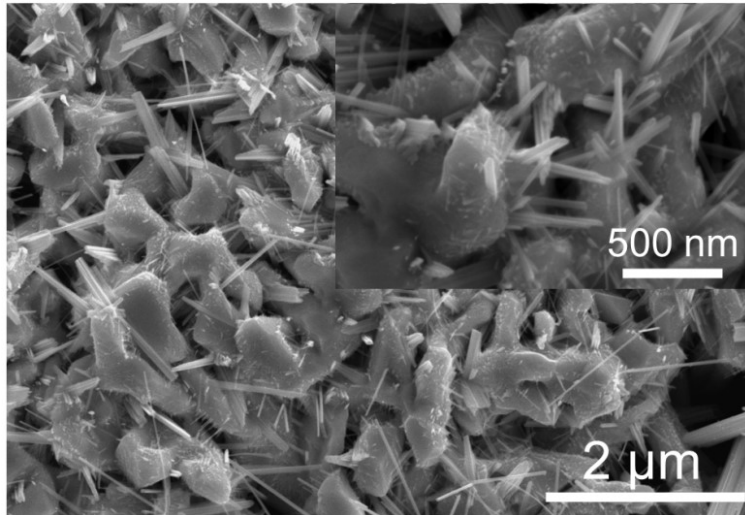

**Fig. S4.** SEM images of WO<sub>2</sub>/W annealed at 700 °C.

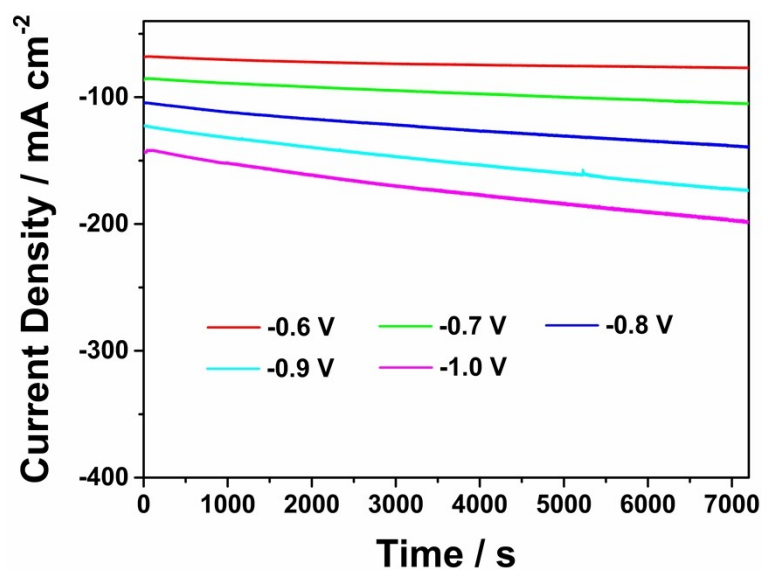

Fig. S5. Chronoamperometry curves of WO<sub>2</sub>/W at each given potential.



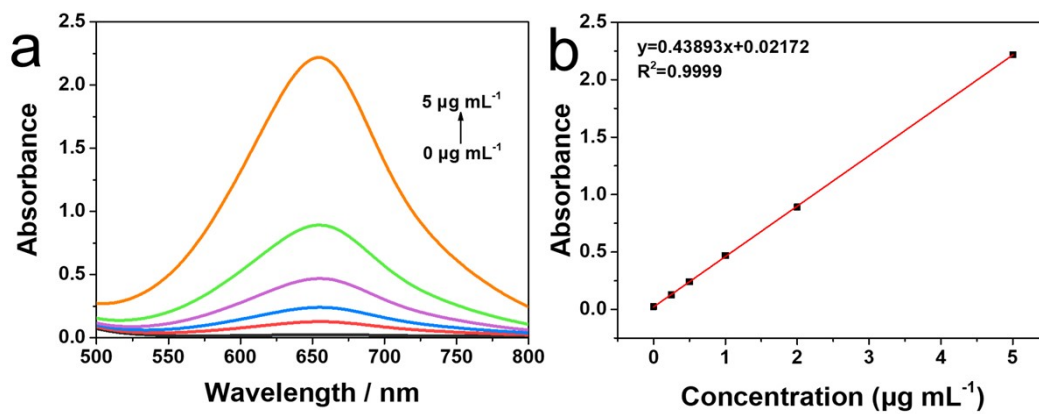

Fig. S6. (a) UV-Vis spectra and (b) corresponding calibration curves were used to calculate  $\text{NH}_4^+$ .

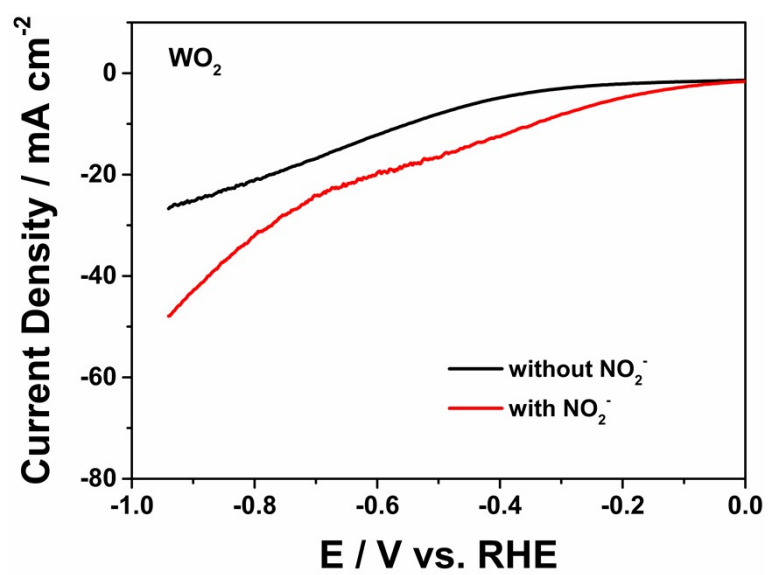

Fig. S7. LSV curves of WO<sub>2</sub>/W in 0.1 M PBS with and without 0.1 M NO<sub>2</sub><sup>-</sup>.

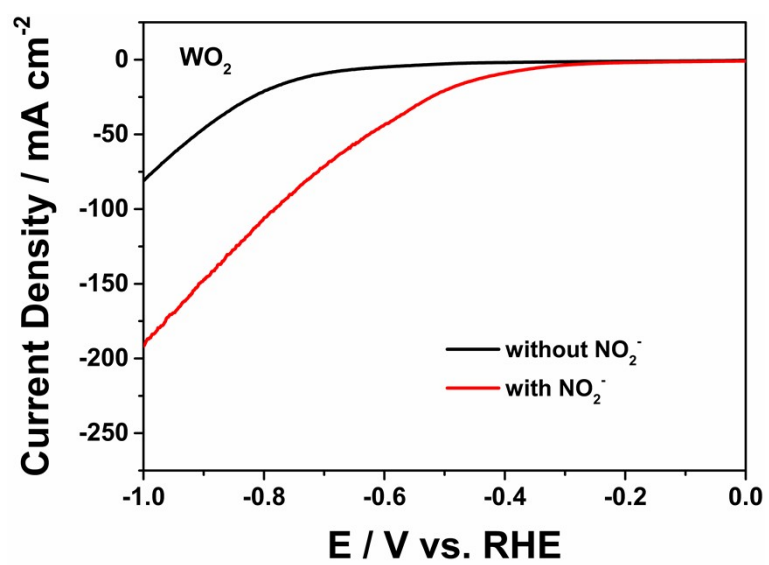

Figure S8. LSV curves of  $\text{WO}_2/\text{W}$  in 0.5 M  $\text{Na}_2\text{SO}_4$  with and without 0.1 M  $\text{NO}_2^-$ .

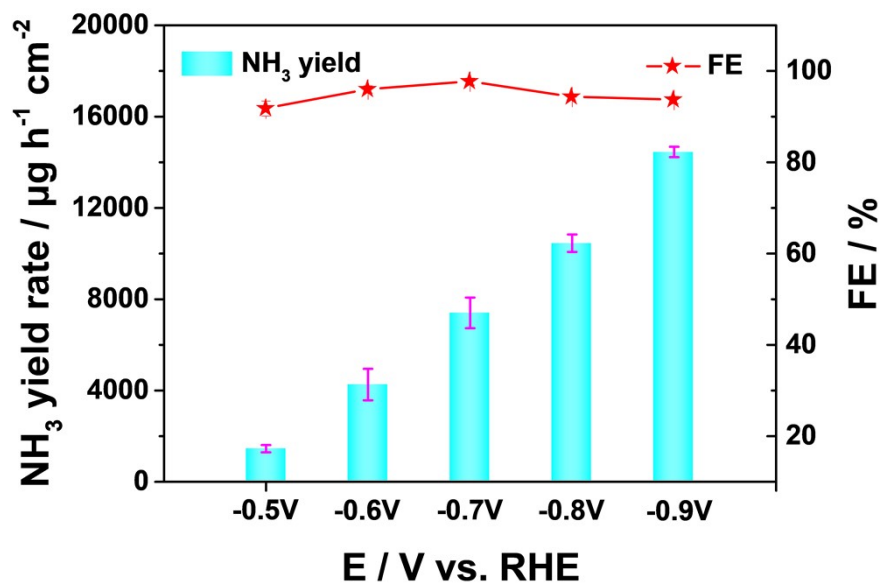

Figure S9.  $\text{NH}_3$  yields and FEs of  $\text{WO}_2/\text{W}$  in 0.5 M  $\text{Na}_2\text{SO}_4$  with 0.1 M  $\text{NO}_2^-$ .

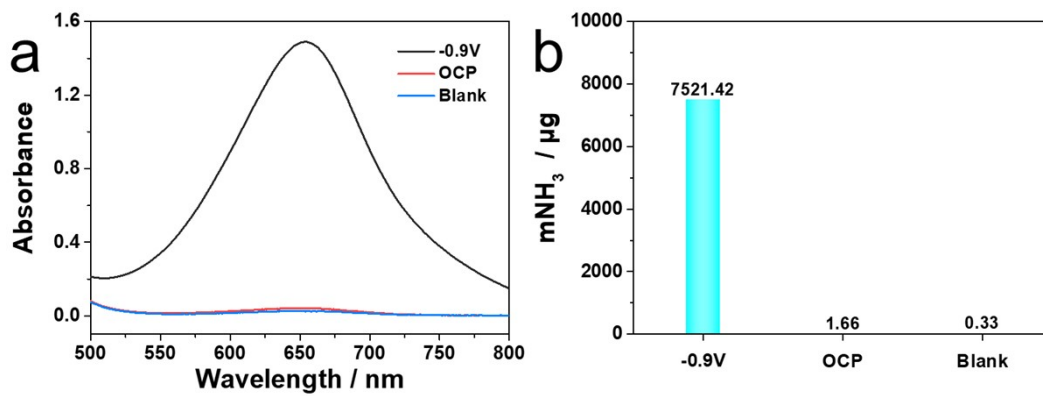

**Fig. S10.** (a) UV-Vis spectra and (b) amounts of electrogenerated NH<sub>3</sub> under different operating conditions.

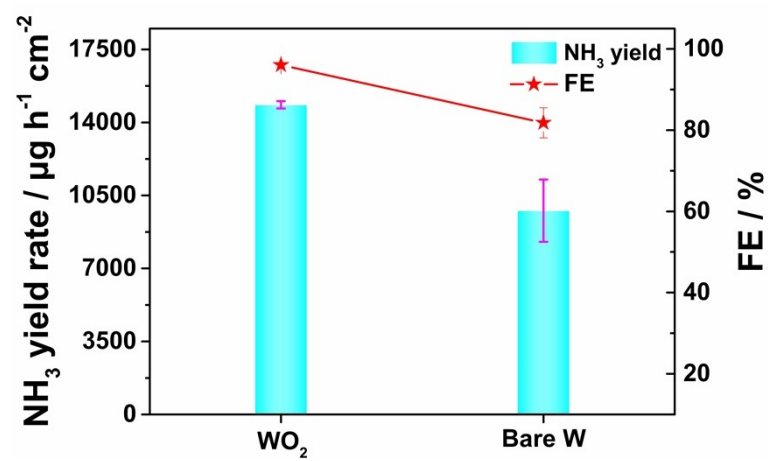

Fig. S11.  $\text{NH}_3$  yields and FEs of  $\text{WO}_2/\text{W}$  and Bare W at  $-0.9$  V.

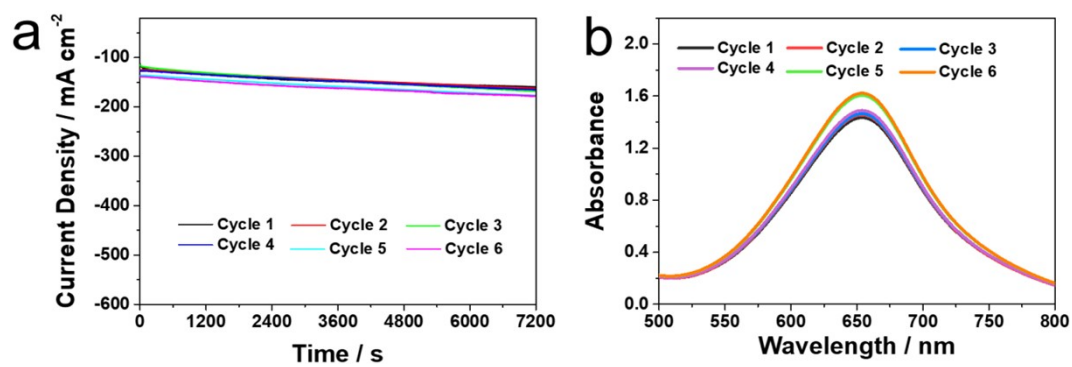

**Fig. S12.** (a) Chronoamperometry curves and (b) corresponding UV-Vis absorption spectra of  $\text{WO}_2/\text{W}$  for electrochemical catalytic production of  $\text{NH}_3$  during cycling tests in 0.1 M NaOH with 0.1 M  $\text{NO}_2^-$  at  $-0.9$  V.

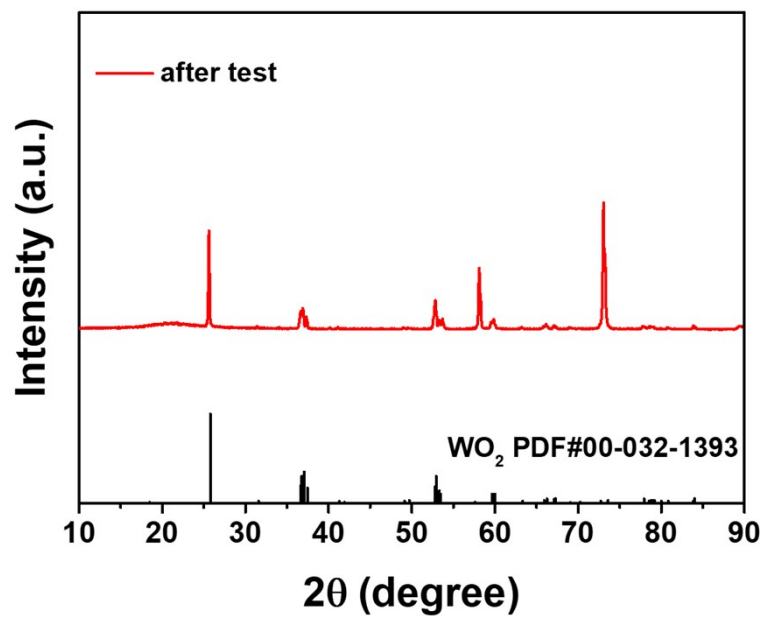

Fig. S13. XRD pattern of WO<sub>2</sub>/W after long-term electrolysis.



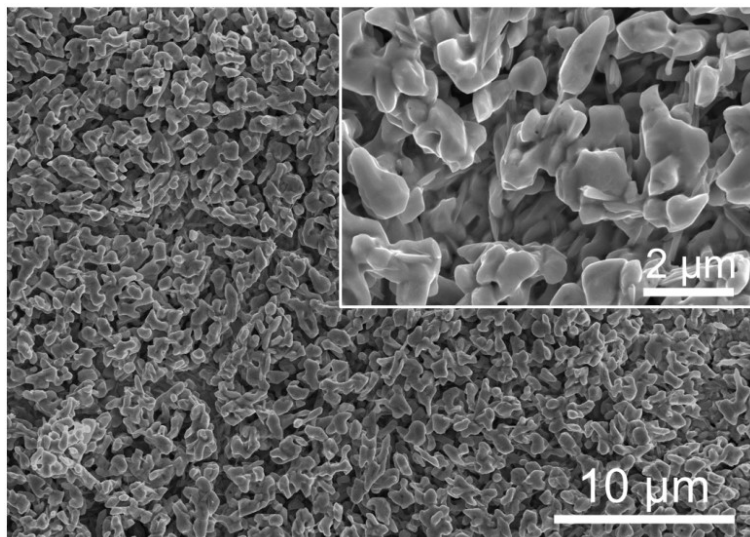

**Fig. S14.** SEM images of WO<sub>2</sub>/W after long-term electrolysis.

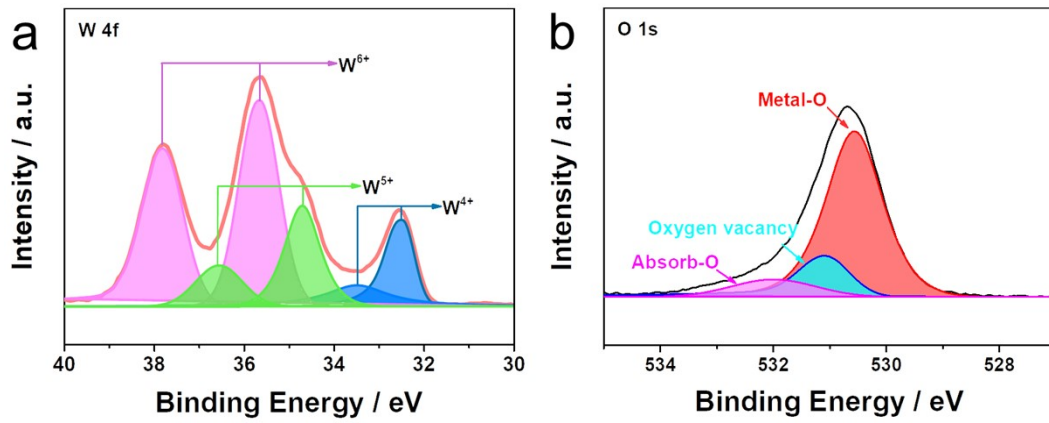

Fig. S15. (a) W 4f and (d) O 1s high-resolution spectra of  $WO_2/W$  after long-term electrolysis.

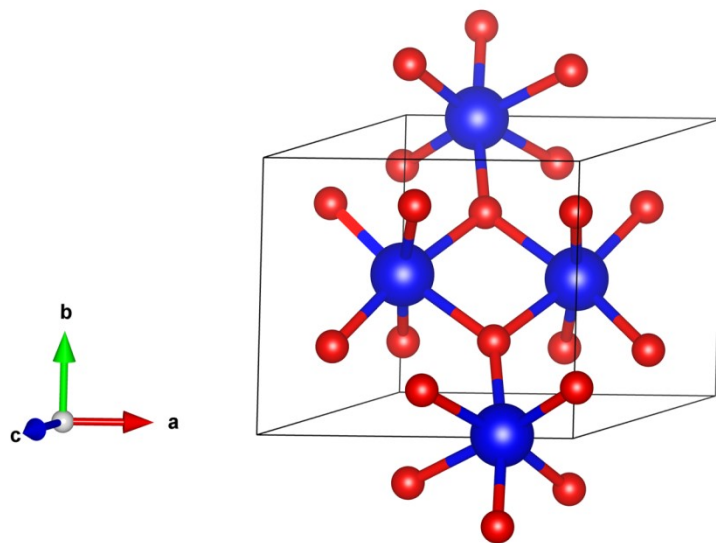

**Fig. S16.** Atomic configurations of WO<sub>2</sub> bulk.

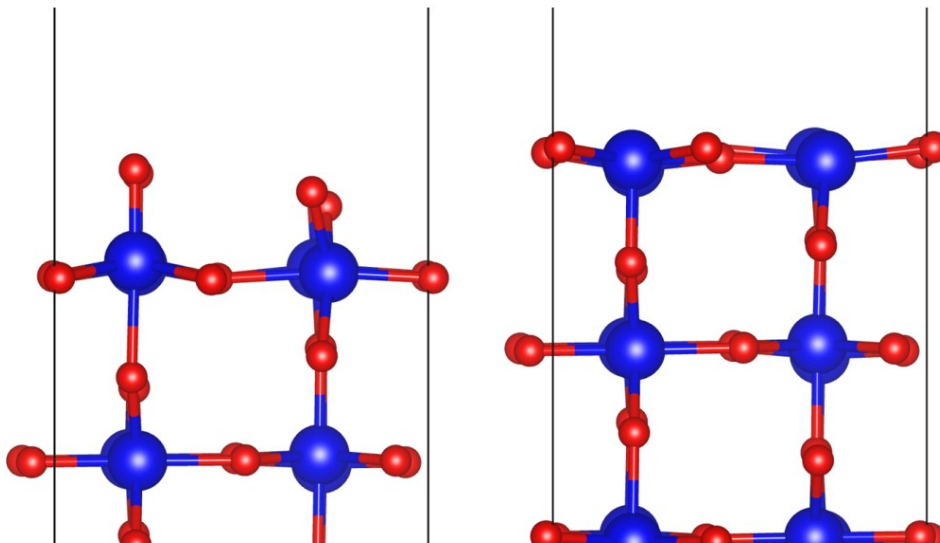

**Fig. S17.** Atomic configurations of WO<sub>2</sub> bulk. WO<sub>2</sub> (011) Slab models with two terminate surfaces, O end and WO end.

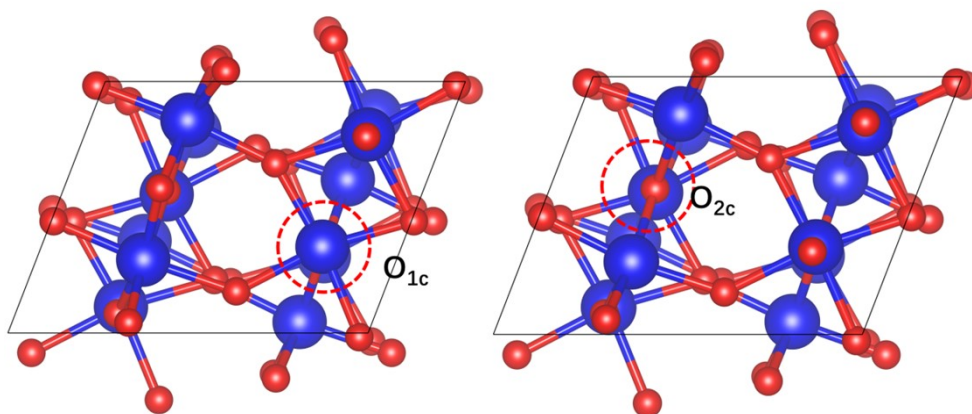

**Fig. S18.** WO<sub>2</sub> (011) Slab models with two types of OVs.

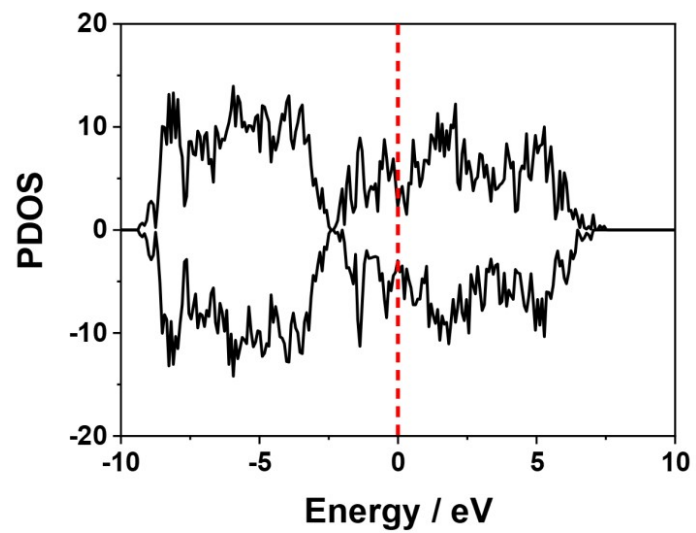

**Fig. S19.** PDOS of  $\text{WO}_2$  (011) with O end terminate surface. Fermi levels are set at 0 eV.

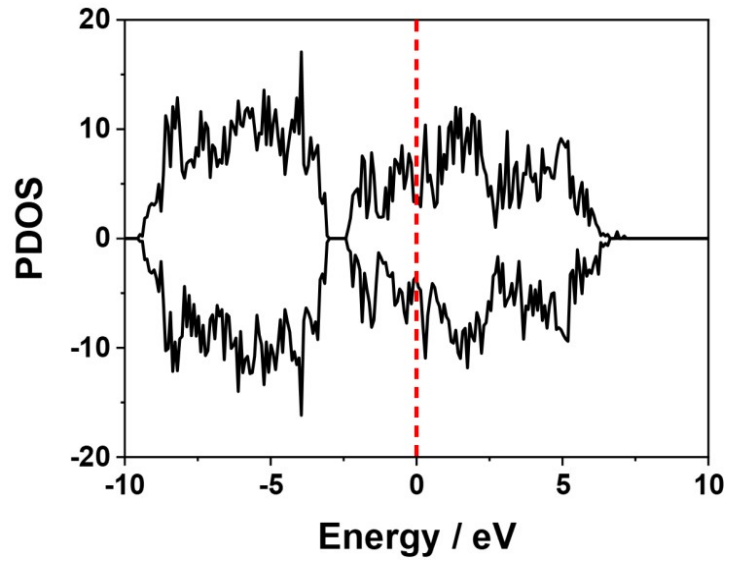

Fig. S20 PDOS of WO<sub>2</sub>(011)-OV. Fermi levels are set at 0 eV.

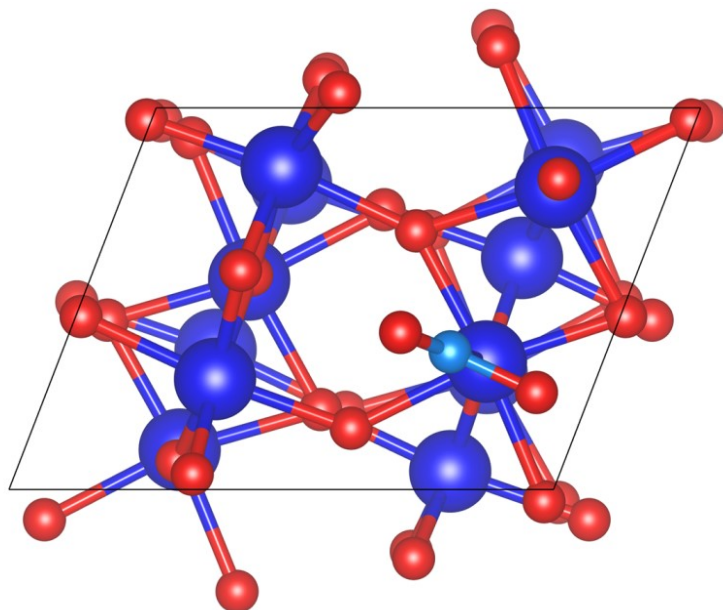

**Fig. S21** The most stable NO<sub>2</sub> adsorption configuration on WO<sub>2</sub>(011)–OV.



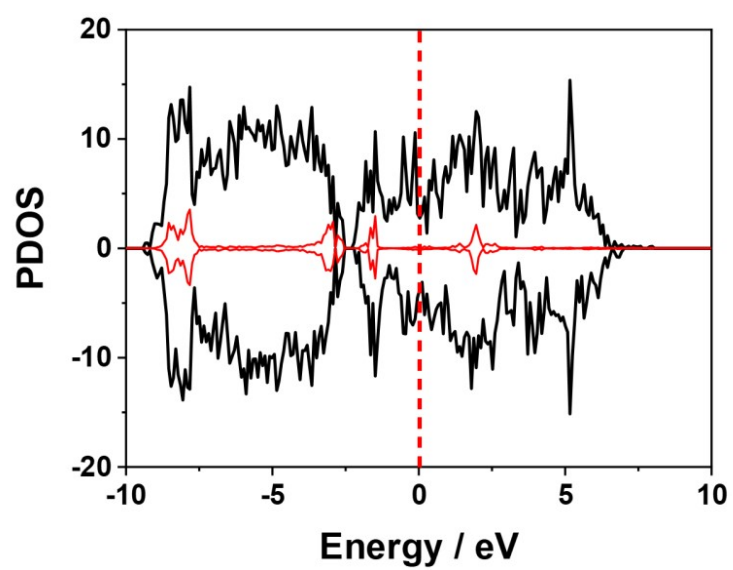

**Fig. S22** PDOS of NO<sub>2</sub> adsorption on WO<sub>2</sub>(011)-OV. Fermi levels are set at 0 eV.

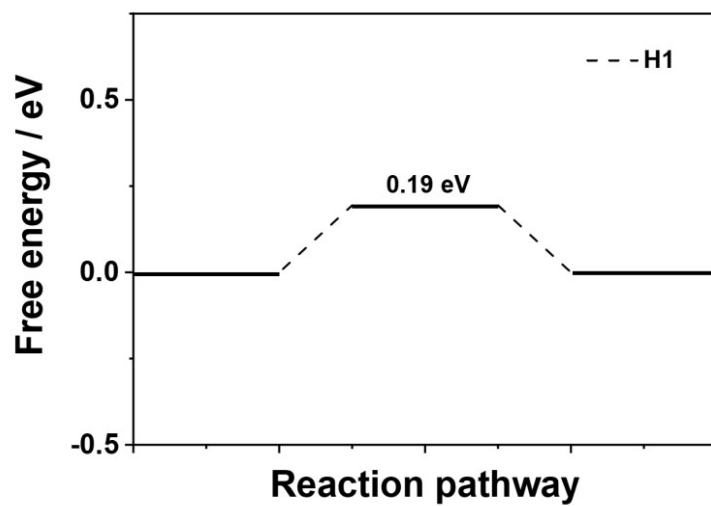

Fig. S23 Free energy diagram of HER processing on  $\text{WO}_2(011)\text{-OV}$ .

**Table S1.** Comparison of catalytic performance of WO<sub>2</sub>/W with other reported NO<sub>2</sub>-RR electrocatalysts.

| Catalyst                               | Electrolyte                                                                      | FE (%)     | NH <sub>3</sub> yield rate                                                      | Refs.     |
|----------------------------------------|----------------------------------------------------------------------------------|------------|---------------------------------------------------------------------------------|-----------|
| WO <sub>2</sub> /W                     | 0.1 M NaOH<br>(0.1 M NaNO <sub>2</sub> )                                         | 94.32      | 14964.25 μg h <sup>-1</sup> cm <sup>-2</sup><br>(880.25 μmol cm <sup>-2</sup> ) | This work |
| CF@Cu <sub>2</sub> O                   | 0.1 M PBS<br>(0.1 M NaNO <sub>2</sub> )                                          | 94.2       | 441.8 μmol cm <sup>-2</sup> h <sup>-1</sup>                                     | 6         |
| [Co(DIM)Br <sub>2</sub> ] <sup>+</sup> | 0.1 M NaNO <sub>2</sub>                                                          | 88         | —                                                                               | 7         |
| Oxo-MoS <sub>x</sub>                   | 0.1 M nitrite in 0.2 M<br>citric acid (pH = 5)                                   | 13.5       | —                                                                               | 8         |
| Cu <sub>80</sub> Ni <sub>20</sub>      | 20 mM NaNO <sub>2</sub><br>(1.0 M NaOH)                                          | 87.6       | —                                                                               | 9         |
| Cu<br>phthalocyanine                   | NaNO <sub>2</sub><br>(0.1 M KOH)                                                 | 78         | —                                                                               | 10        |
| MnO <sub>2</sub> nanoarrays            | 0.1M Na <sub>2</sub> SO <sub>4</sub><br>(4 mM NaNO <sub>2</sub> )                | 6.0        | 3.09 × 10 <sup>-11</sup> mol s <sup>-1</sup><br>cm <sup>-2</sup>                | 11        |
| Rh/Al <sub>2</sub> O <sub>3</sub>      | 25 mM phosphate<br>Buffer+50 mM NO <sub>2</sub> <sup>-</sup>                     | 68~95      | —                                                                               | 12        |
| Ni-NSA-V <sub>Ni</sub>                 | 0.2 M Na <sub>2</sub> SO <sub>4</sub><br>(200 ppm NO <sub>2</sub> <sup>-</sup> ) | 88.9       | 235.98 μmol h <sup>-1</sup> cm <sup>-2</sup>                                    | 13        |
| Cobalt-tripeptide<br>complex           | 1.0 M MOPS buffer<br>(1.0 M NaNO <sub>2</sub> )                                  | 90±3       | 3.01 × 10 <sup>-10</sup> mol s <sup>-1</sup> cm <sup>-2</sup>                   | 14        |
| Poly-NiTRP<br>complex                  | NaNO <sub>2</sub><br>(0.1 M NaClO <sub>4</sub> )                                 | —          | 1.1 mM                                                                          | 15        |
| FeN <sub>5</sub> H <sub>2</sub>        | 1.0 M MOPS<br>(1.0 M NaNO <sub>2</sub> )                                         | > 90       | —                                                                               | 16        |
| Cu <sub>3</sub> P NA/CF                | 0.1 M PBS<br>(0.1 M NaNO <sub>2</sub> )                                          | 91.2 ± 2.5 | 1626.6 μg h <sup>-1</sup> cm <sup>-2</sup>                                      | 17        |

**Table S2.** Comparison of NH<sub>3</sub> yield and power density of our battery with recent Zn-N<sub>2</sub>, Zn-NO, Zn-NO<sub>2</sub><sup>-</sup>, or Zn-NO<sub>3</sub><sup>-</sup> battery systems.

| Catalyst                         | Battery Type                    | Power density (mW cm <sup>-2</sup> ) | Refs.     |
|----------------------------------|---------------------------------|--------------------------------------|-----------|
| WO <sub>2</sub> /W               | Zn-NO <sub>2</sub> <sup>-</sup> | 5.05                                 | This work |
| Cu NDs                           | Zn-N <sub>2</sub>               | 0.0101                               | 18        |
| FeHTNs                           | Zn-N <sub>2</sub>               | 0.01642                              | 19        |
| VN@NSC                           | Zn-N <sub>2</sub>               | 0.01642                              | 20        |
| CoPi/HSNPC                       | Zn-N <sub>2</sub>               | 0.31                                 | 21        |
| NbS <sub>2</sub>                 | Zn-N <sub>2</sub>               | 0.31                                 | 22        |
| CoPi/NPCS                        | Zn-N <sub>2</sub>               | 0.49                                 | 23        |
| Ti <sub>2</sub> O <sub>3</sub>   | Zn-N <sub>2</sub>               | 1.02                                 | 24        |
| FePS <sub>3</sub>                | Zn-N <sub>2</sub>               | 2.6                                  | 25        |
| CoP                              | Zn-NO                           | 0.496                                | 26        |
| NiO                              | Zn-NO                           | 0.88                                 | 27        |
| MoS <sub>2</sub>                 | Zn-NO                           | 1.04                                 | 28        |
| Fe <sub>2</sub> O <sub>3</sub>   | Zn-NO                           | 1.18                                 | 29        |
| Ni <sub>2</sub> P                | Zn-NO                           | 1.53                                 | 30        |
| TiO <sub>2</sub> @Ti             | Zn-NO                           | 1.7                                  | 31        |
| MoC                              | Zn-NO                           | 1.8                                  | 32        |
| VN                               | Zn-NO                           | 2.0                                  | 33        |
| CoS                              | Zn-NO                           | 2.06                                 | 34        |
| BiNDs                            | Zn-NO                           | 2.33                                 | 35        |
| Bi@C                             | Zn-NO                           | 2.35                                 | 36        |
| ITO@TiO <sub>2</sub> TP          | Zn-NO <sub>2</sub> <sup>-</sup> | 1.22                                 | 37        |
| A-TiO <sub>2-x</sub>             | Zn-NO <sub>2</sub> <sup>-</sup> | 2.38                                 | 38        |
| Co <sub>3</sub> O <sub>4</sub>   | Zn-NO <sub>2</sub> <sup>-</sup> | 6.03                                 | 39        |
| TiO <sub>2</sub>                 | Zn-NO <sub>3</sub> <sup>-</sup> | 0.87                                 | 40        |
| Fe/Ni <sub>2</sub> P             | Zn-NO <sub>3</sub> <sup>-</sup> | 3.25                                 | 41        |
| Co <sub>2</sub> AlO <sub>4</sub> | Zn-NO <sub>3</sub> <sup>-</sup> | 3.43                                 | 42        |
| CeO <sub>2</sub>                 | Zn-NO <sub>3</sub> <sup>-</sup> | 3.44                                 | 43        |
| NiCo <sub>2</sub> O <sub>4</sub> | Zn-NO <sub>3</sub> <sup>-</sup> | 3.94                                 | 44        |

## References

- 1 G. Kresse and J. Hafner, *Phys. Rev. B*, 1994, **49**, 14251-14269.
- 2 G. Kresse and D. Joubert, *Phys. Rev. B*, 1999, **59**, 1758-1775.
- 3 J. P. Perdew, K. Burke and M. Ernzerhof, *Phys. Rev. Lett.*, 1996, **77**, 3865-3868.
- 4 H. J. Monkhorst and J. D. Pack, *Phys. Rev. B*, 1976, **13**, 5188-5192.
- 5 V. Wang, N. Xu, J.-C. Liu, G. Tang and W.-T. Geng, *Comput. Phys. Commun.*, 2021, **267**, 108033.
- 6 Q. Chen, X. An, Q. Liu, X. Wu, L. Xie, J. Zhang, W. Yao, M. S. Hamdy, Q. Kong and X. Sun, *Chem. Commun.*, 2022, **58**, 517-520.
- 7 S. Xu, H.-Y. Kwon, D. C. Ashley, C.-H. Chen, E. Jakubikova and J. M. Smith, *Inorg. Chem.*, 2019, **58**, 9443-9451.
- 8 D. He, Y. Li, H. Ooka, Y. K. Go, F. Jin, S. H. Kim and R. Nakamura, *J. Am. Chem. Soc.*, 2018, **140**, 2012-2015.
- 9 L. Mattarozzi, S. Cattarin, N. Comisso, P. Guerriero, M. Musiani, L. Vázquez-Gómez and E. Verlato, *Electrochim. Acta*, 2013, **89**, 488-496.
- 10 N. Chebotareva and T. Nyokong, *J. Appl. Electrochem.*, 1997, **27**, 975-981.
- 11 R. Wang, Z. Wang, X. Xiang, R. Zhang, X. Shi and X. Sun, *Chem. Commun.*, 2018, **54**, 10340-10342.
- 12 C. A. Clark, C. P. Reddy, H. Xu, K. N. Heck, G. Luo, T. P. Senftle and M. S. Wong, *ACS Catal.*, 2019, **10**, 494-509.

- 13 C. Wang, W. Zhou, Z. Sun, Y. Wang, B. Zhang and Y. Yu, *J. Mater. Chem. A*, 2021, **9**, 239-243.
- 14 Y. Guo, J. R. Stroka, B. Kandemir, C. E. Dickerson and K. L. Bren, *J. Am. Chem. Soc.*, 2018, **140**, 16888-16892.
- 15 P. Dreyse, M. Isaacs, K. Calfumán, C. Cáceres, A. Aliaga, M. J. Aguirre and D. Villagra, *Electrochim. Acta*, 2011, **56**, 5230-5237.
- 16 J. R. Stroka, B. Kandemir, E. M. Matson and K. L. Bren, *ACS Catal.*, 2020, **10**, 13968-13972.
- 17 J. Liang, B. Deng, Q. Liu, G. Wen, Q. Liu, T. Li, Y. Luo, A. A. Alshehri, K. A. Alzahrani and D. Ma, *Green Chem.*, 2021, **23**, 5487-5493.
- 18 C. Du, Y. Gao, J. Wang and W. Chem. Commun., 2019, **55**, 12801-12804.
- 19 X.-W. Lv, X.-L. Liu, L.-J. Gao, Y.-P. Liu and Z.-Y. Yuan, *J. Mater. Chem. A*, 2021, **9**, 4026-4035.
- 20 X.-W. Lv, Y. Liu, Y.-S. Wang, X.-L. Liu and Z.-Y. Yuan, *Appl. Catal. B*, 2021, **280**, 119434.
- 21 J.-T. Ren, L. Chen, Y. Liu and Z.-Y. Yuan, *J. Mater. Chem. A*, 2021, **9**, 11370-11380.
- 22 H. Wang, J. Si, T. Zhang, Y. Li, B. Yang, Z. Li, J. Chen, Z. Wen, C. Yuan, L. Lei and Y. Hou, *Appl. Catal. B*, 2020, **270**, 118892.
- 23 J. T. Ren, L. Chen, H. Y. Wang and Z. Y. Yuan, *ACS Appl. Mater. Interfaces*, 2021, **13**, 12106-12117.
- 24 H.-j. Chen, Z.-q. Xu, S. Sun, Y. Luo, Q. Liu, M. S. Hamdy, Z.-s. Feng, X. Sun

- and Y. Wang, *Inorg. Chem. Front.*, 2022, **9**, 4608-4613.
- 25 H. Wang, Z. Li, Y. Li, B. Yang, J. Chen, L. Lei, S. Wang and Y. Hou, *Nano Energy*, 2021, **81**.
- 26 J. Liang, W.-F. Hu, B. Song, T. Mou, L. Zhang, Y. Luo, Q. Liu, A. A. Alshehri, M. S. Hamdy, L.-M. Yang and X. Sun, *Inorg. Chem. Front.*, 2022, **9**, 1366-1372.
- 27 P. Liu, J. Liang, J. Wang, L. Zhang, J. Li, L. Yue, Y. Ren, T. Li, Y. Luo, N. Li, B. Tang, Q. Liu, A. M. Asiri, Q. Kong and X. Sun, *Chem. Commun.*, 2021, **57**, 13562-13565.
- 28 L. Zhang, J. Liang, Y. Wang, T. Mou, Y. Lin, L. Yue, T. Li, Q. Liu, Y. Luo, N. Li, B. Tang, Y. Liu, S. Gao, A. A. Alshehri, X. Guo, D. Ma and X. Sun, *Angew. Chem. Int. Ed*, 2021, **60**, 25263-25268.
- 29 J. Liang, H. Chen, T. Mou, L. Zhang, Y. Lin, L. Yue, Y. Luo, Q. Liu, N. Li, A. A. Alshehri, I. Shakir, P. O. Agboola, Y. Wang, B. Tang, D. Ma and X. Sun, *J. Mater. Chem. A*, 2022, **10**, 6454-6462.
- 30 T. Mou, J. Liang, Z. Ma, L. Zhang, Y. Lin, T. Li, Q. Liu, Y. Luo, Y. Liu, S. Gao, H. Zhao, A. M. Asiri, D. Ma and X. Sun, *J. Mater. Chem. A*, 2021, **9**, 24268-24275.
- 31 J. Liang, P. Liu, Q. Li, T. Li, L. Yue, Y. Luo, Q. Liu, N. Li, B. Tang, A. A. Alshehri, I. Shakir, P. O. Agboola, C. Sun and X. Sun, *Angew. Chem. Int. Ed*, 2022, **61**, e202202087.
- 32 G. Meng, M. Jin, T. Wei, Q. Liu, S. Zhang, X. Peng, J. Luo and X. Liu, *Nano*

- Res.*, 2022, DOI: 10.1007/s12274-022-4747-y.
- 33 D. Qi, F. Lv, T. Wei, M. Jin, G. Meng, S. Zhang, Q. Liu, W. Liu, D. Ma, M. S. Hamdy, J. Luo and X. Liu, *Nano Res. Energy*, 2022, **1**, e9120022.
- 34 L. Zhang, Q. Zhou, J. Liang, L. Yue, T. Li, Y. Luo, Q. Liu, N. Li, B. Tang, F. Gong, X. Guo and X. Sun, *Inorg. Chem.*, 2022, **61**, 8096-8102.
- 35 Y. Lin, J. Liang, H. Li, L. Zhang, T. Mou, T. Li, L. Yue, Y. Ji, Q. Liu, Y. Luo, N. Li, B. Tang, Q. Wu, M. S. Hamdy, D. Ma and X. Sun, *Mater. Today Phys.*, 2022, **22**.
- 36 Q. Liu, Y. Lin, L. Yue, J. Liang, L. Zhang, T. Li, Y. Luo, M. Liu, J. You, A. A. Alshehri, Q. Kong and X. Sun, *Nano Res.*, 2022, **15**, 5032-5037.
- 37 S. Li, J. Liang, P. Wei, Q. Liu, L. Xie, Y. Luo and X. Sun, *eScience*, 2022, **2**, 382-388.
- 38 Z. Ren, Q. Chen, X. An, Q. Liu, L. Xie, J. Zhang, W. Yao, M. S. Hamdy, Q. Kong and X. Sun, *Inorg. Chem.*, 2022, **61**, 12895-12902.
- 39 R. Zhang, S. Zhang, Y. Guo, C. Li, J. Liu, Z. Huang, Y. Zhao, Y. Li and C. Zhi, *Energy & Environmental Science*, 2022, **15**, 3024-3032.
- 40 Y. Guo, R. Zhang, S. Zhang, Y. Zhao, Q. Yang, Z. Huang, B. Dong and C. Zhi, *Energy Environ. Sci.*, 2021, **14**, 3938-3944.
- 41 R. Zhang, Y. Guo, S. Zhang, D. Chen, Y. Zhao, Z. Huang, L. Ma, P. Li, Q. Yang, G. Liang and C. Zhi, *Adv. Energy Mater.*, 2022, **12**.
- 42 Z. Deng, J. Liang, Q. Liu, C. Ma, L. Xie, L. Yue, Y. Ren, T. Li, Y. Luo, N. Li, B. Tang, A. Ali Alshehri, I. Shakir, P. O. Agboola, S. Yan, B. Zheng, J. Du, Q.



- Kong and X. Sun, *Chem. Eng. J.*, 2022, **435**.
- 43 Z. Li, Z. Deng, L. Ouyang, X. Fan, L. Zhang, S. Sun, Q. Liu, A. A. Alshehri, Y. Luo, Q. Kong and X. Sun, *Nano Res.*, 2022, DOI: 10.1007/s12274-022-4863-8.
- 44 Q. Liu, L. Xie, J. Liang, Y. Ren, Y. Wang, L. Zhang, L. Yue, T. Li, Y. Luo, N. Li, B. Tang, Y. Liu, S. Gao, A. A. Alshehri, I. Shakir, P. O. Agboola, Q. Kong, Q. Wang, D. Ma and X. Sun, *Small*, 2022, **18**, 2106961.
